# Supplementary material for: Remarkable enhancement of photocatalytic performance in LaCrO3 through a controlled chemical reduction process
Source: Royal Society of Chemistry journal article supplement (doi:10.1039/d2dt03806d), 2023-01-01
Supplement: d2dt03806d1.pdf [file d2dt03806d1.pdf]

Supplementary Information

# Remarkable enhancement of the photocatalytic performance in $\text{LaCrO}_3$ through controlled chemical reduction process.

*Lijun He<sup>a</sup>, Jia Yang<sup>b,c</sup>, Wenbin Guo<sup>b</sup>, Yan Li<sup>a</sup>, Alberto J. Fernández-Carrión<sup>b\*</sup>, X.*

*Kuang<sup>ab\*</sup>*

<sup>a</sup> Guangxi Key Laboratory of Electrochemical and Magnetochemical Functional Materials, College of Chemistry and Bioengineering, Guilin University of Technology, Guilin 541004, P. R. China.

<sup>b</sup> MOE Key Laboratory of New Processing Technology for Nonferrous Metals and Materials, Guangxi Key Laboratory of Optical and Electronic Materials and Devices, Guangxi Universities Key Laboratory of Nonferrous Metal Oxide Electronic Functional Materials and Devices, College of Materials Science and Engineering, Guilin University of Technology, Guilin 541004, P. R. China.

<sup>c</sup> College of Chemistry and Chemical Engineering, Yangtze Normal University, Fuling, Chongqing 408100, P. R. China.

[\\*albert@glut.edu.cn](mailto:*albert@glut.edu.cn); [kuangxj@glut.edu.cn](mailto:kuangxj@glut.edu.cn)

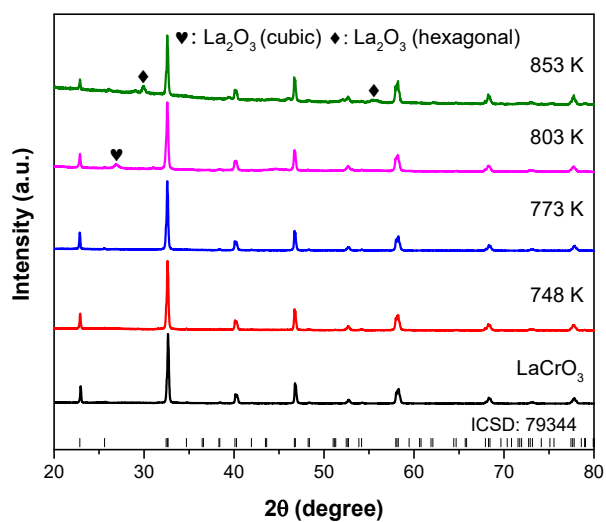

**Supplementary Figure 1.** Laboratory XRD data recorded for LaCrO<sub>3</sub> reduced at different temperatures but with a fix 1:3 LaCrO<sub>3</sub>:CaH<sub>2</sub> molar ratio for three days. The bragg peaks placed at the bottom of the figure refer to the orthorhombic phase of LaCrO<sub>3</sub>. The heart and diamond symbols refer to La<sub>2</sub>O<sub>3</sub> (cubic phase) and La<sub>2</sub>O<sub>3</sub> (hexagonal polymorph), respectively.

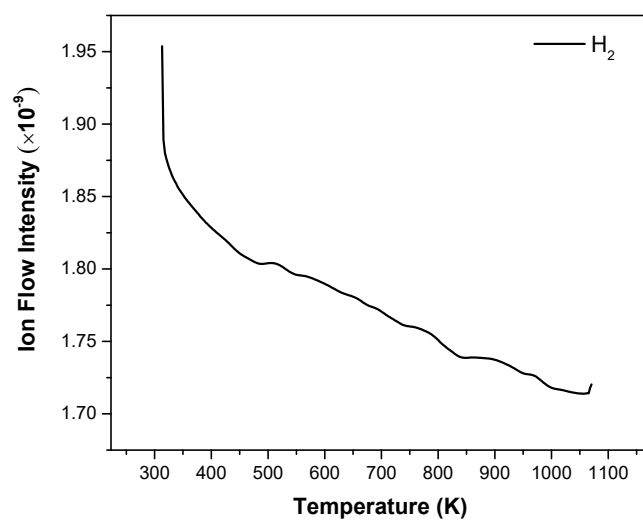

**Supplementary Figure 2.** Mass-spectrometry of H<sub>2</sub> gas species during heating of LaCrO<sub>3- $\delta$</sub>  under flowing Ar.

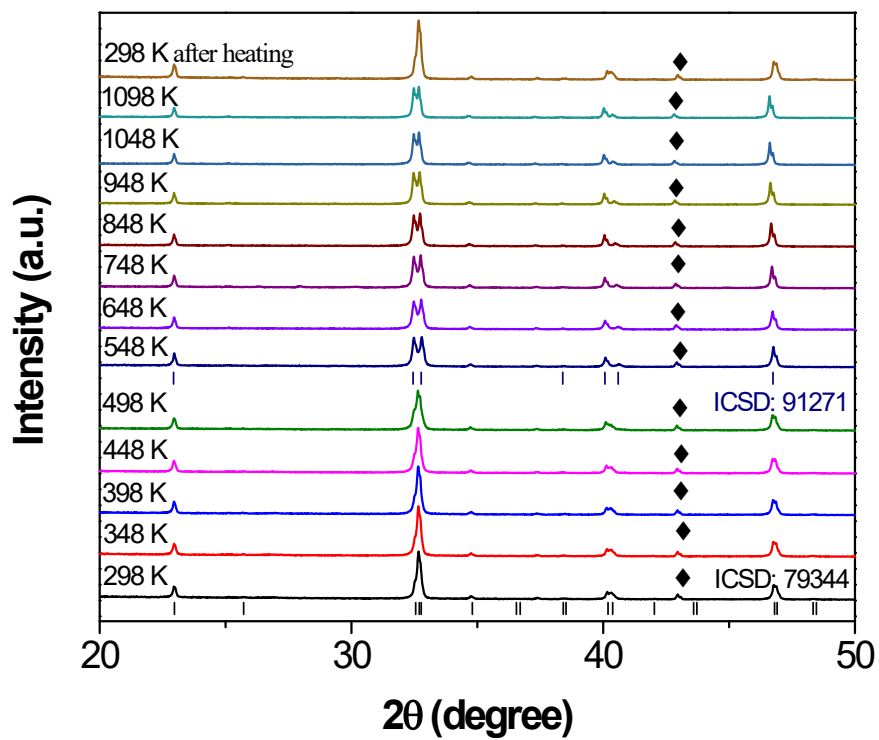

**Supplementary Figure 3.** VTXRD data recorded for  $\text{LaCrO}_{3.8}$  (reduced at 773 K) for three days. Diamond marks indicate the presence of  $\text{Al}_2\text{O}_3$  arising from the sample holder.

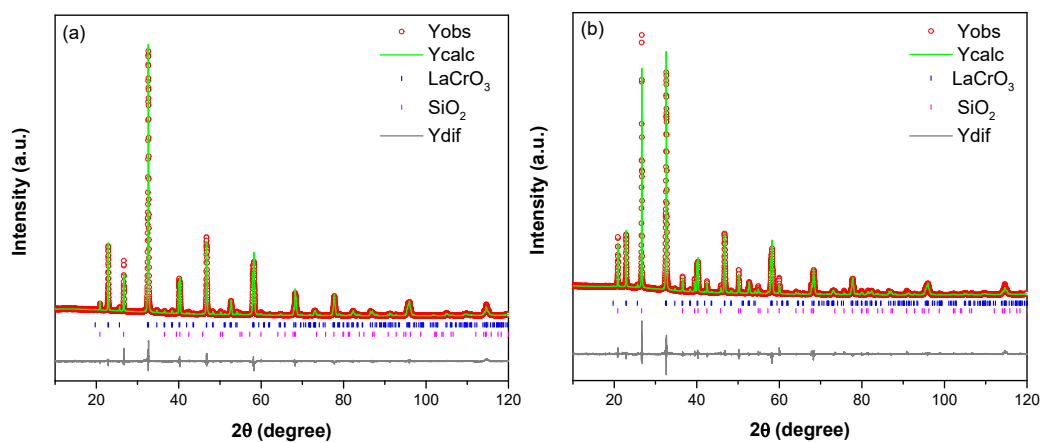

**Supplementary Figure 4.** Rietveld plots of XRD data of LaCrO<sub>3</sub> (a) and LaCrO<sub>3-δ</sub> (b).

The reliability factors are  $R_{wp} \sim 6.69\%$ ,  $R_p \sim 3.66\%$ ,  $GOF \sim 1.83$  (a), and  $R_{wp} \sim 7.49\%$ ,  $R_p \sim 3.38\%$ ,  $GOF \sim 2.22$  (b). The pink and blue Bragg peaks denote SiO<sub>2</sub> and LaCrO<sub>3</sub> (orthorhombic) phases.

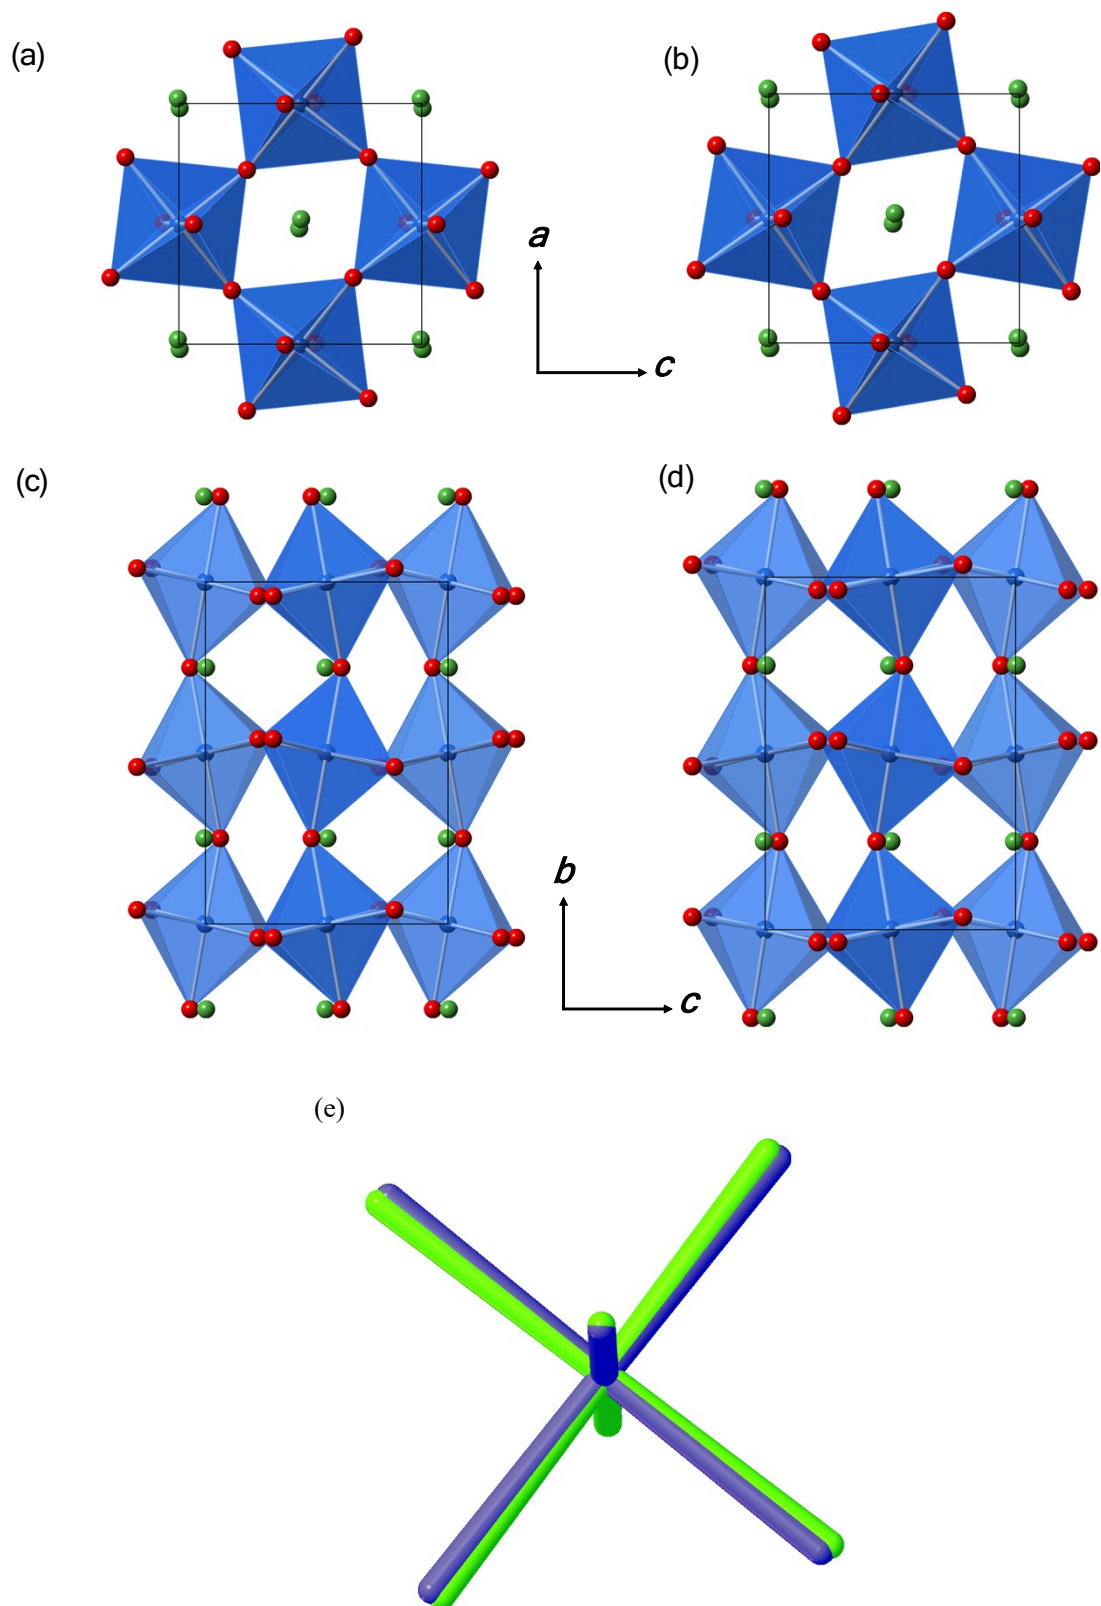

**Supplementary Figure 5.** View of the refined structure of  $\text{LaCrO}_3$  (a and c) and  $\text{LaCrO}_{3-\delta}$  (b and d). (e) Structural overlay of  $\text{CrO}_6$  octahedron in the sticks and wireframe mode. The blue and green ones stand for octahedra in the parent and reduced  $\text{LaCrO}_3$ .
